# Supplementary material
Source: MDPI journal article supplement (https://www.mdpi.com/2075-163X/13/6/736)
Supplement: s1 [file s1]

## Supplementary Materials

# Extraction of Lanthanides(III) from Aqueous Nitric Acid Solutions with Tetra(n-octyl)diglycolamide into Methyltrioctylammonium Bis(trifluoromethanesulfonyl)imide Ionic Liquid and its Mixtures with Molecular Organic Diluents

**Table S1.** The effect of HNO<sub>3</sub> concentration in the aqueous phase on the transfer of Tf<sub>2</sub>N<sup>-</sup> ions into the aqueous phase.

| [HNO <sub>3</sub> ], M | [Tf <sub>2</sub> N <sup>-</sup> ], M |
|------------------------|--------------------------------------|
| 0.3                    | 0.000135                             |
| 1.0                    | 0.00038                              |
| 2.0                    | 0.00045                              |
| 3.0                    | 0.0009                               |
| 4.0                    | 0.00145                              |
| 5.0                    | 0.00255                              |
| 6.0                    | 0.00395                              |
| 7.0                    | 0.0064                               |

**Table S2.** The effect of HNO<sub>3</sub> concentrations in the aqueous phase on the extraction of Ln(III) with 0.01 M solutions of TODGA in [N<sub>1888</sub>][Tf<sub>2</sub>N].

| [HNO <sub>3</sub> ], M | logD <sub>Ln</sub> |         |         |         |         |         |
|------------------------|--------------------|---------|---------|---------|---------|---------|
|                        | Tb(III)            | Eu(III) | Nd(III) | Pr(III) | Ce(III) | La(III) |
| 0.10                   | 3.75               | 3.50    | 2.79    | 2.42    | 1.87    | 1.18    |
| 0.30                   | 3.80               | 3.55    | 2.91    | 2.58    | 2.08    | 1.25    |
| 0.50                   | 3.80               | 3.50    | 2.89    | 2.54    | 2.07    | 1.23    |
| 1.00                   | 3.55               | 3.27    | 2.65    | 2.26    | 1.87    | 1.05    |
| 2.00                   | 2.68               | 2.41    | 1.77    | 1.43    | 0.97    | 0.19    |
| 3.00                   | 2.18               | 1.91    | 1.28    | 0.92    | 0.51    | -0.31   |
| 4.00                   | 1.85               | 1.57    | 0.91    | 0.56    | 0.12    | -0.65   |
| 5.00                   | 1.59               | 1.29    | 0.59    | -0.01   | -0.47   | -1.02   |

**Table S3.** The effect of NO<sub>3</sub><sup>-</sup> concentrations in the aqueous phase on the extraction of Ln(III) with 0.01 M solutions of TODGA in [N<sub>1888</sub>][Tf<sub>2</sub>N]. [H<sup>+</sup>] = 2 M.

| [NO <sub>3</sub> <sup>-</sup> ], M | logD <sub>Ln</sub> |         |         |         |         |
|------------------------------------|--------------------|---------|---------|---------|---------|
|                                    | Eu(III)            | Nd(III) | Pr(III) | Ce(III) | La(III) |
| 2.00                               | 2.41               | 1.77    | 1.43    | 0.97    | 0.19    |
| 3.00                               | 2.45               | 1.79    | 1.45    | 1.01    | 0.21    |
| 4.00                               | 2.47               | 1.80    | 1.49    | 1.02    | 0.22    |
| 5.00                               | 2.37               | 1.71    | 1.38    | 0.92    | 0.15    |
| 6.00                               | 2.30               | 1.60    | 1.29    | 0.79    | 0.02    |

**Table S4.** The effect of  $H^+$  concentrations in the aqueous phase on the extraction of Ln(III) with 0.01 M solutions of TODGA in  $[N_{1888}][Tf_2N]$ .  $[NO_3^-] = 4$  M.

| Log[H <sup>+</sup> ] | logD <sub>Ln</sub> |         |         |         |         |         |
|----------------------|--------------------|---------|---------|---------|---------|---------|
|                      | Tb(III)            | Eu(III) | Nd(III) | Pr(III) | Ce(III) | La(III) |
| -1.00                |                    |         |         |         | 3.08    | 2.15    |
| -0.52                |                    |         |         | 3.05    | 2.68    | 1.82    |
| -0.30                |                    |         | 3.11    | 2.85    | 2.45    | 1.59    |
| 0.00                 |                    |         | 2.68    | 2.36    | 1.91    | 1.13    |
| 0.176                | 3.08               | 2.82    | 2.14    | 1.84    | 1.36    | 0.57    |
| 0.30                 | 2.75               | 2.47    | 1.80    | 1.49    | 1.02    | 0.22    |
| 0.477                | 2.22               | 1.92    | 1.24    | 0.95    | 0.47    | -0.30   |
| 0.60                 | 1.85               | 1.57    | 0.90    | 0.56    | 0.12    | -0.65   |

**Table S5.** The effect of TODGA concentration in  $[N_{1888}][Tf_2N]$  on the extraction of lanthanides(III) from 3 M HNO<sub>3</sub> solutions.

| log[TODGA] | logD <sub>Ln</sub> |         |         |         |         |         |         |         |
|------------|--------------------|---------|---------|---------|---------|---------|---------|---------|
|            | Ho(III)            | Yb(III) | Lu(III) | Sm(III) | Nd(III) | Pr(III) | Ce(III) | La(III) |
| -2.52      | 0.72               | 0.48    | 0.32    | 0.23    | -0.18   | -0.55   |         |         |
| -2.30      | 1.37               | 1.14    | 0.96    | 0.86    | 0.43    | 0.05    | -0.32   |         |
| -2.15      | 1.83               | 1.59    | 1.43    | 1.28    | 0.87    | 0.46    | 0.09    | -0.73   |
| -2.00      | 2.28               | 2.04    | 1.86    | 1.69    | 1.28    | 0.92    | 0.50    | -0.30   |
| -1.82      |                    |         |         | 2.22    | 1.82    | 1.37    | 1.04    | 0.21    |
| -1.70      |                    |         |         |         | 2.15    | 1.71    | 1.37    | 0.53    |
| -1.52      |                    |         |         |         |         | 2.22    | 1.89    | 1.02    |

**Table S6.** The extraction of lanthanides(III) from 3 M HNO<sub>3</sub> solutions with 0.01 M TODGA solutions in [N<sub>1888</sub>][Tf<sub>2</sub>N], [C<sub>4</sub>mim][Tf<sub>2</sub>N], and dichloroethane (DCE).

| Ln | $\log D_{Ln}$                           |                                         |       |
|----|-----------------------------------------|-----------------------------------------|-------|
|    | [N <sub>1888</sub> ][Tf <sub>2</sub> N] | [C <sub>4</sub> mim][Tf <sub>2</sub> N] | DCE   |
| La | −0.30                                   | 0.58                                    | −0.72 |
| Ce | 0.50                                    | 0.86                                    | −0.30 |
| Pr | 0.92                                    | 0.89                                    | −0.09 |
| Nd | 1.28                                    | 0.81                                    | 0.04  |
| Sm | 1.80                                    | 0.79                                    | 0.28  |
| Eu | 1.91                                    | 0.77                                    | 0.48  |
| Gd | 1.82                                    | 0.69                                    | 0.55  |
| Tb | 2.18                                    | 0.78                                    | 1.01  |
| Dy | 2.28                                    | 0.77                                    | 1.27  |
| Ho | 2.28                                    | 0.73                                    | 1.47  |
| Er | 2.25                                    | 0.68                                    | 1.59  |
| Tm | 2.17                                    | 0.62                                    | 1.65  |
| Yb | 2.04                                    | 0.55                                    | 1.67  |
| Lu | 1.86                                    | 0.46                                    | 1.72  |

**Table S7.** The extraction of lanthanides(III) from 4 M  $\text{NH}_4\text{NO}_3$  solutions with 0.01 M TODGA solutions in DCE and DCE containing 0.01 M  $[\text{N}_{1888}][\text{Tf}_2\text{N}]$ .

| Ln | $\log D_{\text{Ln}}$ |                                                                |
|----|----------------------|----------------------------------------------------------------|
|    | DCE                  | DCE containing 0.01 M $[\text{N}_{1888}][\text{Tf}_2\text{N}]$ |
| La | −0.20                | 0.77                                                           |
| Ce | 0.10                 | 1.08                                                           |
| Pr | 0.29                 | 1.27                                                           |
| Nd | 0.34                 | 1.39                                                           |
| Sm | 0.42                 | 1.80                                                           |
| Eu | 0.46                 | 2.01                                                           |
| Gd | 0.42                 | 1.90                                                           |
| Tb | 0.69                 | 2.51                                                           |
| Dy | 0.89                 | 2.77                                                           |
| Ho | 1.06                 | 2.98                                                           |
| Er | 1.20                 | 3.06                                                           |
| Tm | 1.25                 | 3.12                                                           |
| Yb | 1.28                 | 3.15                                                           |
| Lu | 1.30                 | 3.22                                                           |

**Table S8.** The extraction of lanthanides(III) from 1 M HNO<sub>3</sub> solutions with 0.01 M TODGA solutions in nitrobenzene (NB), octanol (OC), dichloroethane (DCE), nonane containing 1.1 M TBP (N/TBP), and chloroform (CL) in the presence of 0.01 M [N<sub>1888</sub>][Tf<sub>2</sub>N].

| Ln | <b>logD<sub>Ln</sub></b> |           |            |              |           |
|----|--------------------------|-----------|------------|--------------|-----------|
|    | <b>NB</b>                | <b>OC</b> | <b>DCE</b> | <b>N/TBP</b> | <b>CL</b> |
| La | −0.23                    | −0.86     | −0.61      | −0.29        | −1.18     |
| Ce | 0.19                     | −0.57     | −0.26      | −0.12        | −0.71     |
| Pr | 0.41                     | −0.32     | −0.11      | −0.02        | −0.41     |
| Nd | 0.58                     | −0.13     | 0.03       | 0.06         | −0.21     |
| Sm | 1.13                     | 0.56      | 0.46       | 0.34         | 0.14      |
| Eu | 1.38                     | 0.85      | 0.71       | 0.59         | 0.26      |
| Gd | 1.28                     | 0.71      | 0.65       | 0.54         | 0.22      |
| Tb | 1.89                     | 1.40      | 1.21       | 1.04         | 0.49      |
| Dy | 2.11                     | 1.62      | 1.44       | 1.26         | 0.67      |
| Ho | 2.26                     | 1.81      | 1.60       | 1.40         | 0.78      |
| Er | 2.31                     | 1.88      | 1.67       | 1.52         | 0.84      |
| Tm | 2.35                     | 1.91      | 1.72       | 1.55         | 0.85      |
| Yb | 2.39                     | 1.90      | 1.71       | 1.59         | 0.85      |
| Lu | 2.41                     | 1.88      | 1.75       | 1.60         | 0.85      |

**Table S9.** The effect of HNO<sub>3</sub> concentrations in the aqueous phase on the extraction of Eu(III) with 0.01 M solutions of TODGA (L) in DCE, nonane containing 1.1 M TBP, and DCE in the presence of 0.1 M [N<sub>1888</sub>][Tf<sub>2</sub>N].

| <b>log[HNO<sub>3</sub>]</b> | <b>logD<sub>Eu</sub></b> |                          |                     |              |
|-----------------------------|--------------------------|--------------------------|---------------------|--------------|
|                             | <b>L + IL/DCE</b>        | <b>L + IL/nonane-TBP</b> | <b>L/nonane-TBP</b> | <b>L/DCE</b> |
| −2.000                      | 0.41                     | −0.52                    |                     |              |
| −1.520                      | 1.04                     | 0.00                     |                     |              |
| −1.000                      | 1.60                     | 0.56                     |                     |              |
| −0.520                      | 1.93                     | 0.98                     |                     |              |
| −0.300                      | 2.05                     | 1.15                     | −0.75               | −1.30        |
| 0.000                       | 2.00                     | 1.43                     | 0.01                | −0.56        |
| 0.300                       | 1.69                     | 1.71                     | 0.68                | 0.26         |
| 0.477                       | 1.45                     | 1.91                     | 1.18                | 0.48         |
| 0.600                       | 1.16                     | 2.00                     | 1.47                | 0.52         |
| 0.700                       | 0.94                     | 2.17                     | 1.75                | 0.41         |
| 0.778                       | 0.63                     | 2.24                     | 1.89                | 0.18         |

**Table S10.** The extraction of lanthanides(III) from 3 M HNO<sub>3</sub> solutions with 0.01 M TODGA solutions in DCE, nonane containing 1.1 M TBP, and DCE in the presence of 0.1 M [N<sub>1888</sub>][Tf<sub>2</sub>N].

| Ln | $\log D_{Ln}$ |                   |       |            |
|----|---------------|-------------------|-------|------------|
|    | L/nonane-TBP  | L + IL/nonane-TBP | L/DCE | L + IL/DCE |
| La | 0.08          | 0.54              | −0.72 | −0.80      |
| Ce | 0.18          | 0.65              | −0.30 | −0.45      |
| Pr | 0.27          | 0.68              | −0.09 | −0.03      |
| Nd | 0.39          | 0.76              | 0.04  | 0.48       |
| Sm | 0.97          | 1.60              | 0.28  | 1.15       |
| Eu | 1.18          | 1.91              | 0.48  | 1.45       |
| Gd | 1.03          | 1.82              | 0.55  | 1.38       |
| Tb | 1.76          | 2.48              | 1.01  | 2.04       |
| Dy | 1.97          | 2.68              | 1.27  | 2.28       |
| Ho | 2.22          | 2.87              | 1.47  | 2.50       |
| Er | 2.26          | 2.92              | 1.59  | 2.57       |
| Tm | 2.34          | 3.01              | 1.65  | 2.66       |
| Yb | 2.38          | 3.04              | 1.67  | 2.65       |
| Lu | 2.43          | 3.05              | 1.72  | 2.62       |
